# Supplementary material
Source: publisher site journal article supplement (https://www.dovepress.com/article/563769)
Supplement: Supplementary file 1 [file Supplement%201%20%20Interview%20guide.docx]

**Supplement 1**  Interview guide

| **Patient** | **HCP** |
| --- | --- |
| ①Did you know that cancer treatment could affect fertility? What are your thoughts on fertility preservation? | ①How do you perceive the importance of fertility preservation in patients with gynecological cancer? |
| ②After your diagnosis, did your doctor explain the available fertility preservation options? How well do you understand the pros and cons of each option? | ②How do you assess whether a patient needs fertility preservation counseling? How does the patient’s expressed preference influence your assessment? |
| ③What factors were most important to you when considering whether to preserve your fertility? | ③In your experience, how much do patients typically know about fertility preservation options before starting treatment? |
| ④Who did you talk to when making the decision (e.g., doctors, family, friends)? Did you feel you received enough support? | ④How do you usually provide information or referrals related to fertility preservation? How do you support patients in making informed decisions? |
| ⑤Did you experience any emotional, financial, or time-related difficulties while considering fertility preservation? How did you cope with these challenges? | ⑤What role do family members or partners usually play in the patient’s fertility-related decision-making? How might they influence the patient’ s choice? |
| ⑥What decision did you ultimately make? Looking back, how do you feel about that decision now? | ⑥What challenges do you face when engaging in shared decision-making about fertility preservation with patients? |
| ⑦Do you think decision support or counseling is necessary for patients making fertility-related choices? What is your opinion on this? | ⑦Do you think decision aids are necessary when patients are facing fertility-related decisions? How do you view their role in supporting shared decision-making? |
| ⑧Is there anything else you would like to add or discuss? | ⑧Is there anything else you would like to add or discuss? |
